# Supplementary material
Source: publisher figshare collection journal article supplement (https://acs.figshare.com/ndownloader/files/4146916)
Supplement: Supplementary file 1 [file 4146916]

## Enzymatic Deglutathionylation to Generate Interleukin-4 Cysteine Muteins with Free Thiol

Viswanadham Duppatla<sup>\*†</sup>, Maja Gjorgjevikj<sup>†</sup>, Werner Schmitz<sup>†</sup>, Mathias Kottmair<sup>‡</sup>, Thomas D. Mueller<sup>‡</sup>, and Walter Sebald<sup>†</sup>

### Affiliations:

<sup>†</sup> Lehrstuhl für Physiologische Chemie II, Theodor-Boveri-Institut für Biowissenschaften (Biozentrum) der Universität Würzburg, Würzburg, Germany.

<sup>‡</sup> Lehrstuhl für Botanik I-Molekulare Pflanzenphysiologie und Biophysik, Julius-von-Sachs-Institut für Biowissenschaften (Biozentrum) der Universität Würzburg, Würzburg, Germany.

Running title: Enzymatic deglutathionylation of IL-4

### Contents:

Table S-1 shows primers used for mutagenesis of IL-4 cDNA.

Table S-2 mass spectrometry analysis of purified glutathione-modified IL-4 cysteine muteins.

Table S-3 shows mass spectrometry analysis of purified NEM-labelled IL-4 cysteine analogues.

Figure S-1 shows Mass spectrometry analysis of IL-4S16C and IL4N38C mutein refolded in the presence of 5 mM glutathione,  $\beta$ -mercaptoethanol, cysteamine, or thioglycolate.

Figure S-2 shows SDS PAGE analysis of reduction of IL-4 muteins 74GS, 78GS, and 81GS

Figure S-3 shows time course of IL-4 wild type and IL-4 GS analogues reduction.

Figure S-4 shows SDS PAGE analysis of non-conjugated IL-4 cysteine muteins under reducing and non-reducing conditions.

Figure S-5 shows Mass spectrometry analysis of NEM labelled IL-4 cysteine muteins.

**Table S-1. DNA Sense (S) and Antisense (AS) Primers Used for Mutagenesis of IL-4 cDNA**

|          |    |                                     |
|----------|----|-------------------------------------|
| IL4-S16C | S  | 5'-CAAACTTTGAACTGCCTCACAGAGC-3'     |
| IL4-S16C | AS | 5'-GCTCTGTGAGGCAGTTCAAAGTTTTG-3'    |
| IL4-N38C | S  | 5'-GCTGCCTCCAAGTGTACAACTGAGAAGG-3'  |
| IL4-N38C | AS | 5'-CCTTCTCAGTTGTACACTTGGAGGCAGC-3', |
| IL4-H74C | S  | 5'-CACAGCAGTTCTGCAGGCACAAGC-3'      |
| IL4-H74C | AS | 5'-GTGCCTGCAGAACTGCTGTGCAG-3',      |
| IL4-Q78C | S  | 5'-CAGGCACAAGTGTCTGATCCGATTC-3'     |
| IL4-Q78C | AS | 5'-CGGATCAGACACTTGTGCCTGTG-3',      |
| IL4-R81C | S  | 5'-CAAGCAGCTGATCTGTTTCCTG-3'        |
| IL4-R81C | AS | 5'-GTTTCAGGAAACAGATCAGCTGC-3'       |

**Table S-2. Mass Spectrometry Analysis of Purified Glutathione-Modified IL-4 Cysteine Muteins.** Deconvoluted spectra as shown in figure 2 were evaluated.

|              | glutathione-modified |           |            | glutathione-modified | unmodified |
|--------------|----------------------|-----------|------------|----------------------|------------|
| IL-4 protein | theoretical          | observed  | difference |                      |            |
|              | molecular mass [Da]  |           |            | relative amount [%]  |            |
| IL4WT        | n.d.                 | n.d.      | --         | 0                    | 100        |
| S16C         | 15409.754            | 15409.907 | 0.153      | 100                  | 0          |
| N38C         | 15382.765            | 15382.871 | 0.106      | 97                   | 2.7        |
| H74C         | 15359.749            | 15359.974 | 0.225      | 97                   | 2.6        |
| Q78C         | 15368.749            | 15370.420 | 1.671      | 100                  | 0          |
| R81C         | 15340.706            | 15340.799 | 0.093      | 98                   | 2.1        |

**Table S-3. Mass Spectrometry Analysis of Purified NEM-Labelled IL-4 Cysteine Analogues.** Di-NEM conjugates were not observed (see figure S-5).

| IL4 mutein | Unmodified          |          |            | with one NEM |           |            |
|------------|---------------------|----------|------------|--------------|-----------|------------|
|            | theoretical         | observed | difference | theoretical  | observed  | difference |
|            | Molecular mass [Da] |          |            |              |           |            |
| S16C       | 15104.708           | n.d.     |            | 15229.755    | 15230.744 | 0.989      |
| N38C       | 15077.697           | n.d.     |            | 15202.744    | 15202.626 | -0.118     |
| H74C       | 15054.681           | n.d.     |            | 15179.728    | 15179.712 | -0.016     |
| Q78C       | 15063.681           | n.d.     |            | 15188.729    | 15189.802 | 1.073      |
| R81C       | 15035.639           | n.d.     |            | 15160.686    | 15161.706 | 1.020      |

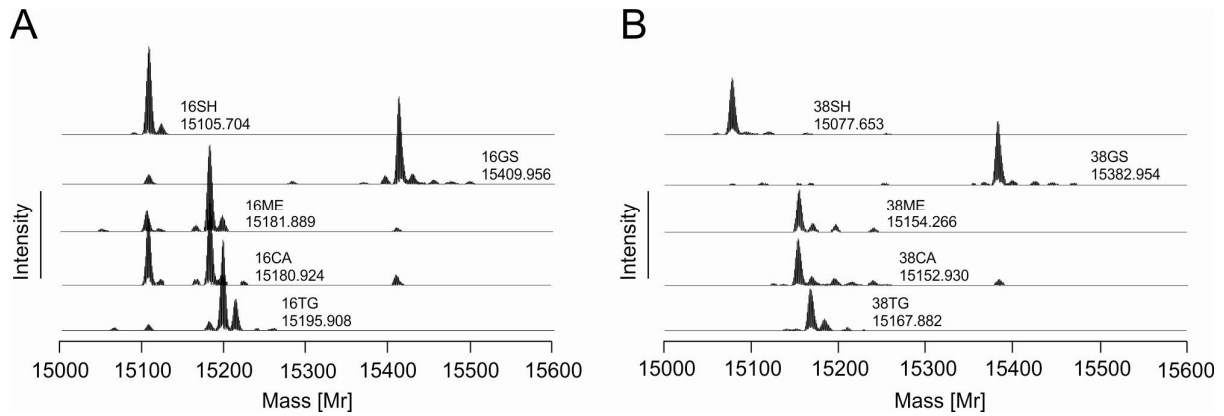

**Figure S-1.** Mass spectrometry analysis of IL-4S16C mutant protein (A) or IL4N38C mutant protein (B) refolded in the presence of 5 mM glutathione (GSH),  $\beta$ -mercaptoethanol (ME), cysteamine (CA), or thioglycolate (TG). The proteins were purified as described under EXPERIMENTAL PROCEDURES. As a reference IL4S16C SH (16SH) and IL4N38C SH (38SH) reduced enzymatically (see figure 7) are included (uppermost trace, each A and B).

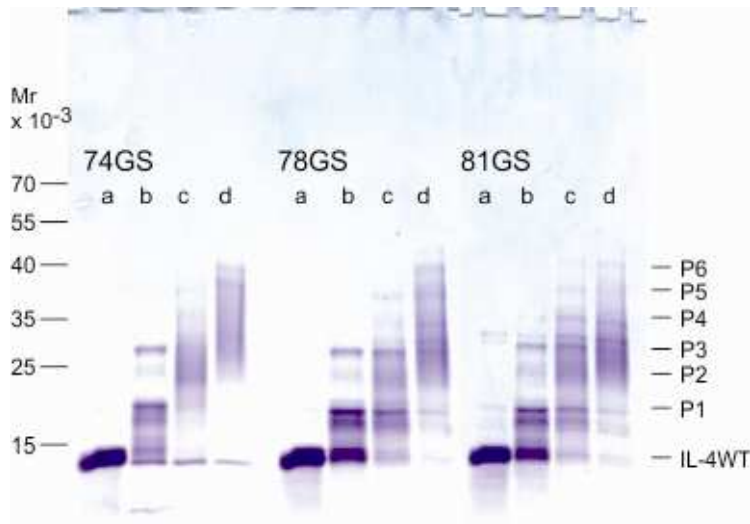

**Figure S-2.** Chemical reduction of 50  $\mu$ M IL-4 proteins 74GS, 78GS, and 81GS with DTT at concentrations of 50  $\mu$ M (lanes b), 100  $\mu$ M (lanes c), and 150  $\mu$ M (lanes d). The controls without DTT reduction are shown in lanes a. After chemical reduction proteins were maleimide-PEGylated and analysed by SDS PAGE (see METHODS) using 4 – 20% polyacrylamide gradient gels. The same aliquot of the reaction mixture containing 3.8  $\mu$ g IL-4 protein was loaded on each lane.

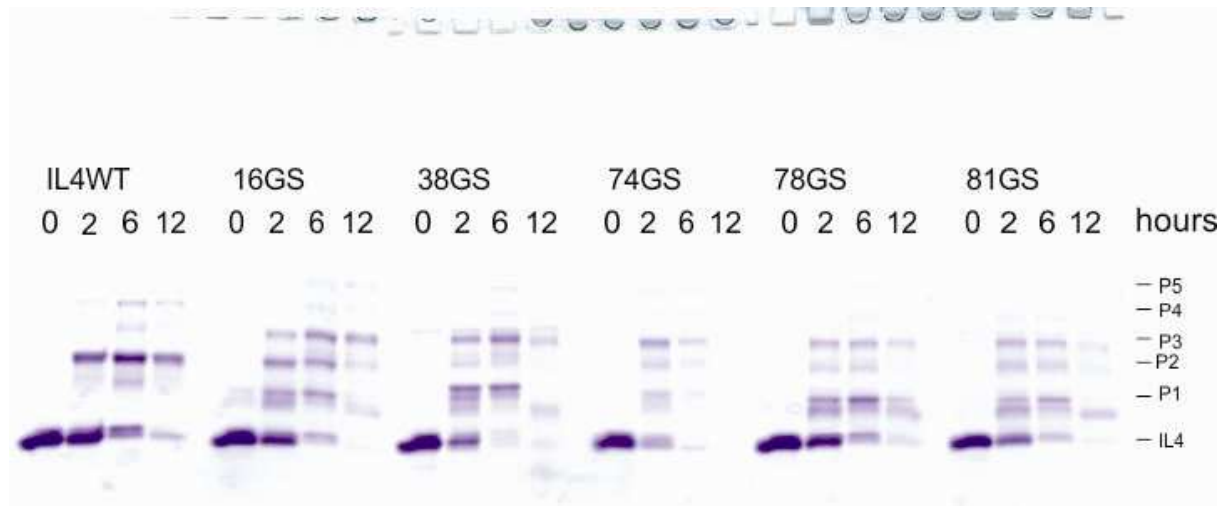

**Figure S-3.** Time course of reduction of IL-4 wild type and IL-4 GS analogues 16GS, 38GS, 74GS, 78GS, and 81GS with 150  $\mu$ M DTT for 0, 2, 6, and 12 hours. After chemical reduction proteins were maleimide-PEGylated and analysed by SDS PAGE (see METHODS) using 4 – 20% polyacrylamide gradient gels. The same aliquot of the reaction mixture containing 3.8  $\mu$ g IL-4 protein was loaded on each lane.

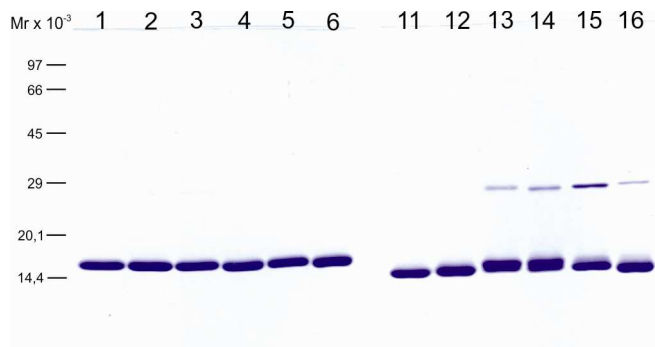

**Figure S-4.** SDS PAGE analysis of IL-4 cysteine mutants with a free thiol group under reducing (lanes 2 – 6) and non-reducing (lanes 12 – 16) conditions. Lanes 1, 11 IL-4WT; lanes 2, 12 16SH; lanes 3, 13 38SH; lanes 4, 14 74SH; lanes 5, 15 78SH; and lanes 6, 16 81SH.

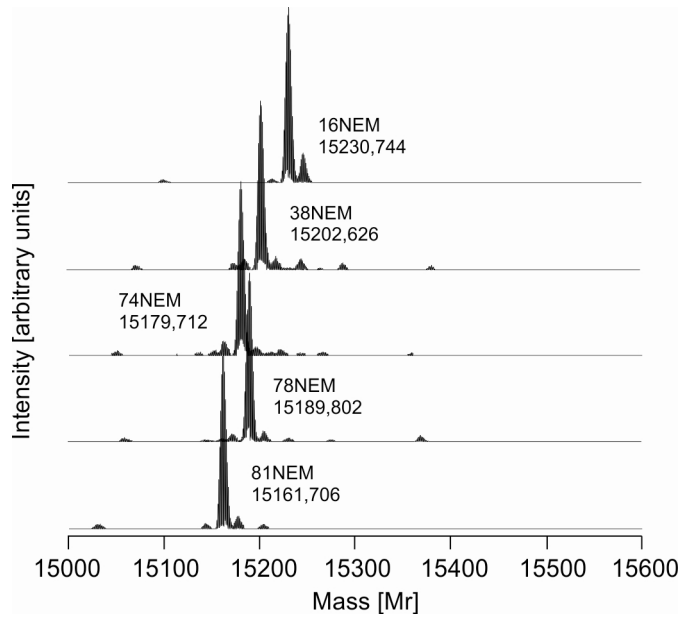

**Figure S-5.** Mass spectrometry analysis of NEM labelled IL-4 cysteine muteins.
